# Supplementary material for: A first principles study of the electronic structure and optical response of heterobimetallic M–dicyanoaurate-based coordination polymers (M = Mn, Co, Ni, Zn and Cd)
Source: Royal Society of Chemistry journal article supplement (doi:10.1039/d4cp01714e), 2024-01-01
Supplement: d4cp01714e6.pdf [file d4cp01714e6.pdf]

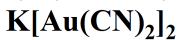

**N1s**

$$\text{BE}_{\text{K[Au(CN)}_2]_2} = 398.5 \text{ eV}$$

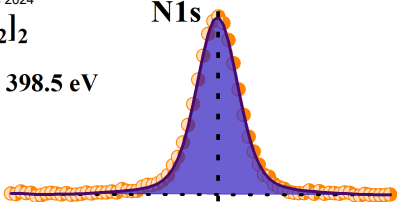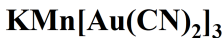

$$\Delta\text{BE}_{\text{K[Au(CN)}_2]} = +0.2 \text{ eV}$$

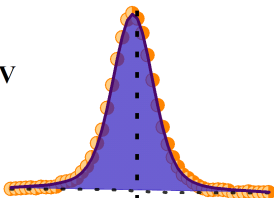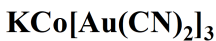

$$\Delta\text{BE}_{\text{K[Au(CN)}_2]} = +0.1 \text{ eV}$$

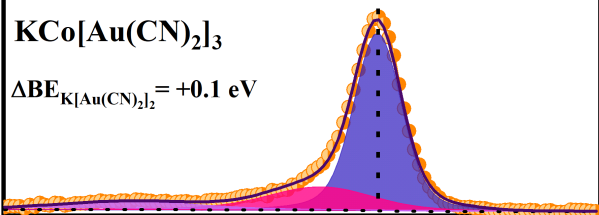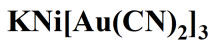

$$\Delta\text{BE}_{\text{K[Au(CN)}_2]} = -0.2 \text{ eV}$$

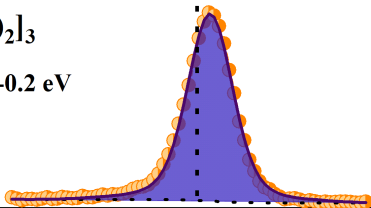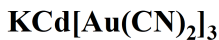

$$\Delta\text{BE}_{\text{K[Au(CN)}_2]} = -0.1 \text{ eV}$$

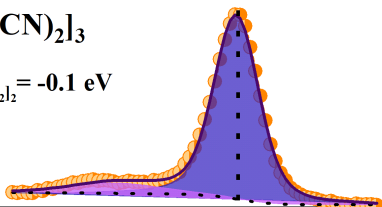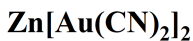

$$\Delta\text{BE}_{\text{K[Au(CN)}_2]} = +0.8 \text{ eV}$$

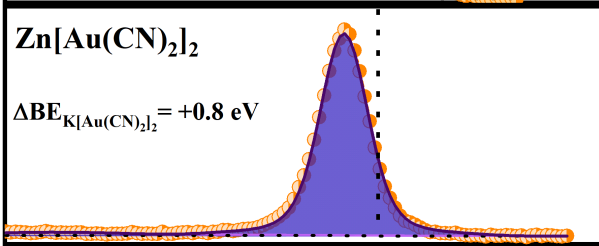

404

402

400

398

396

394

Binding Energy; [eV]

Intensity; [a. u.]
