# Supplementary figures and images for: A first principles study of the electronic structure and optical response of heterobimetallic M–dicyanoaurate-based coordination polymers (M = Mn, Co, Ni, Zn and Cd)
Source: Royal Society of Chemistry journal article supplement (doi:10.1039/d4cp01714e), 2024-01-01

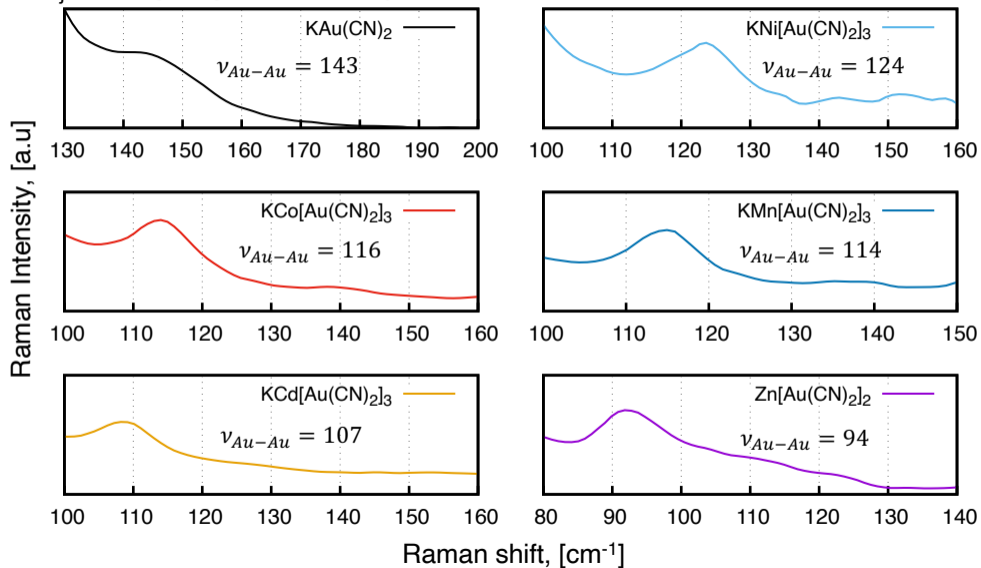

Supplement: d4cp01714e10.pdf [file d4cp01714e10.pdf]

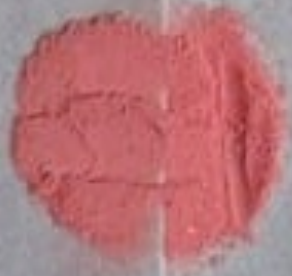

**Co-DAu**

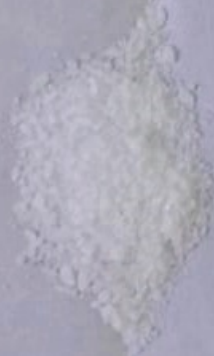

**Zn-DAu**

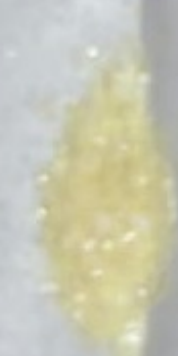

**Cd-DAu**

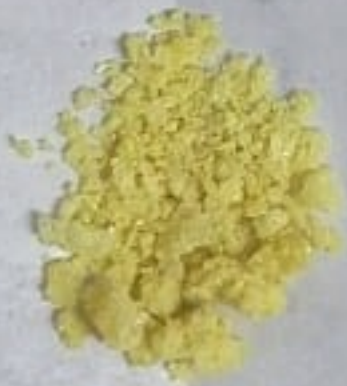

**Mn-DAu**

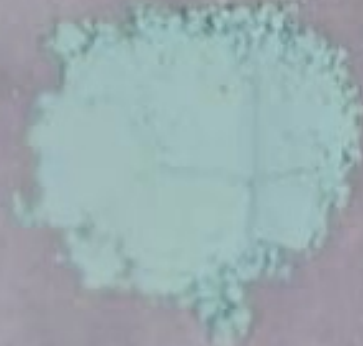

**Ni-DAu**

Supplement: d4cp01714e11.pdf [file d4cp01714e11.pdf]

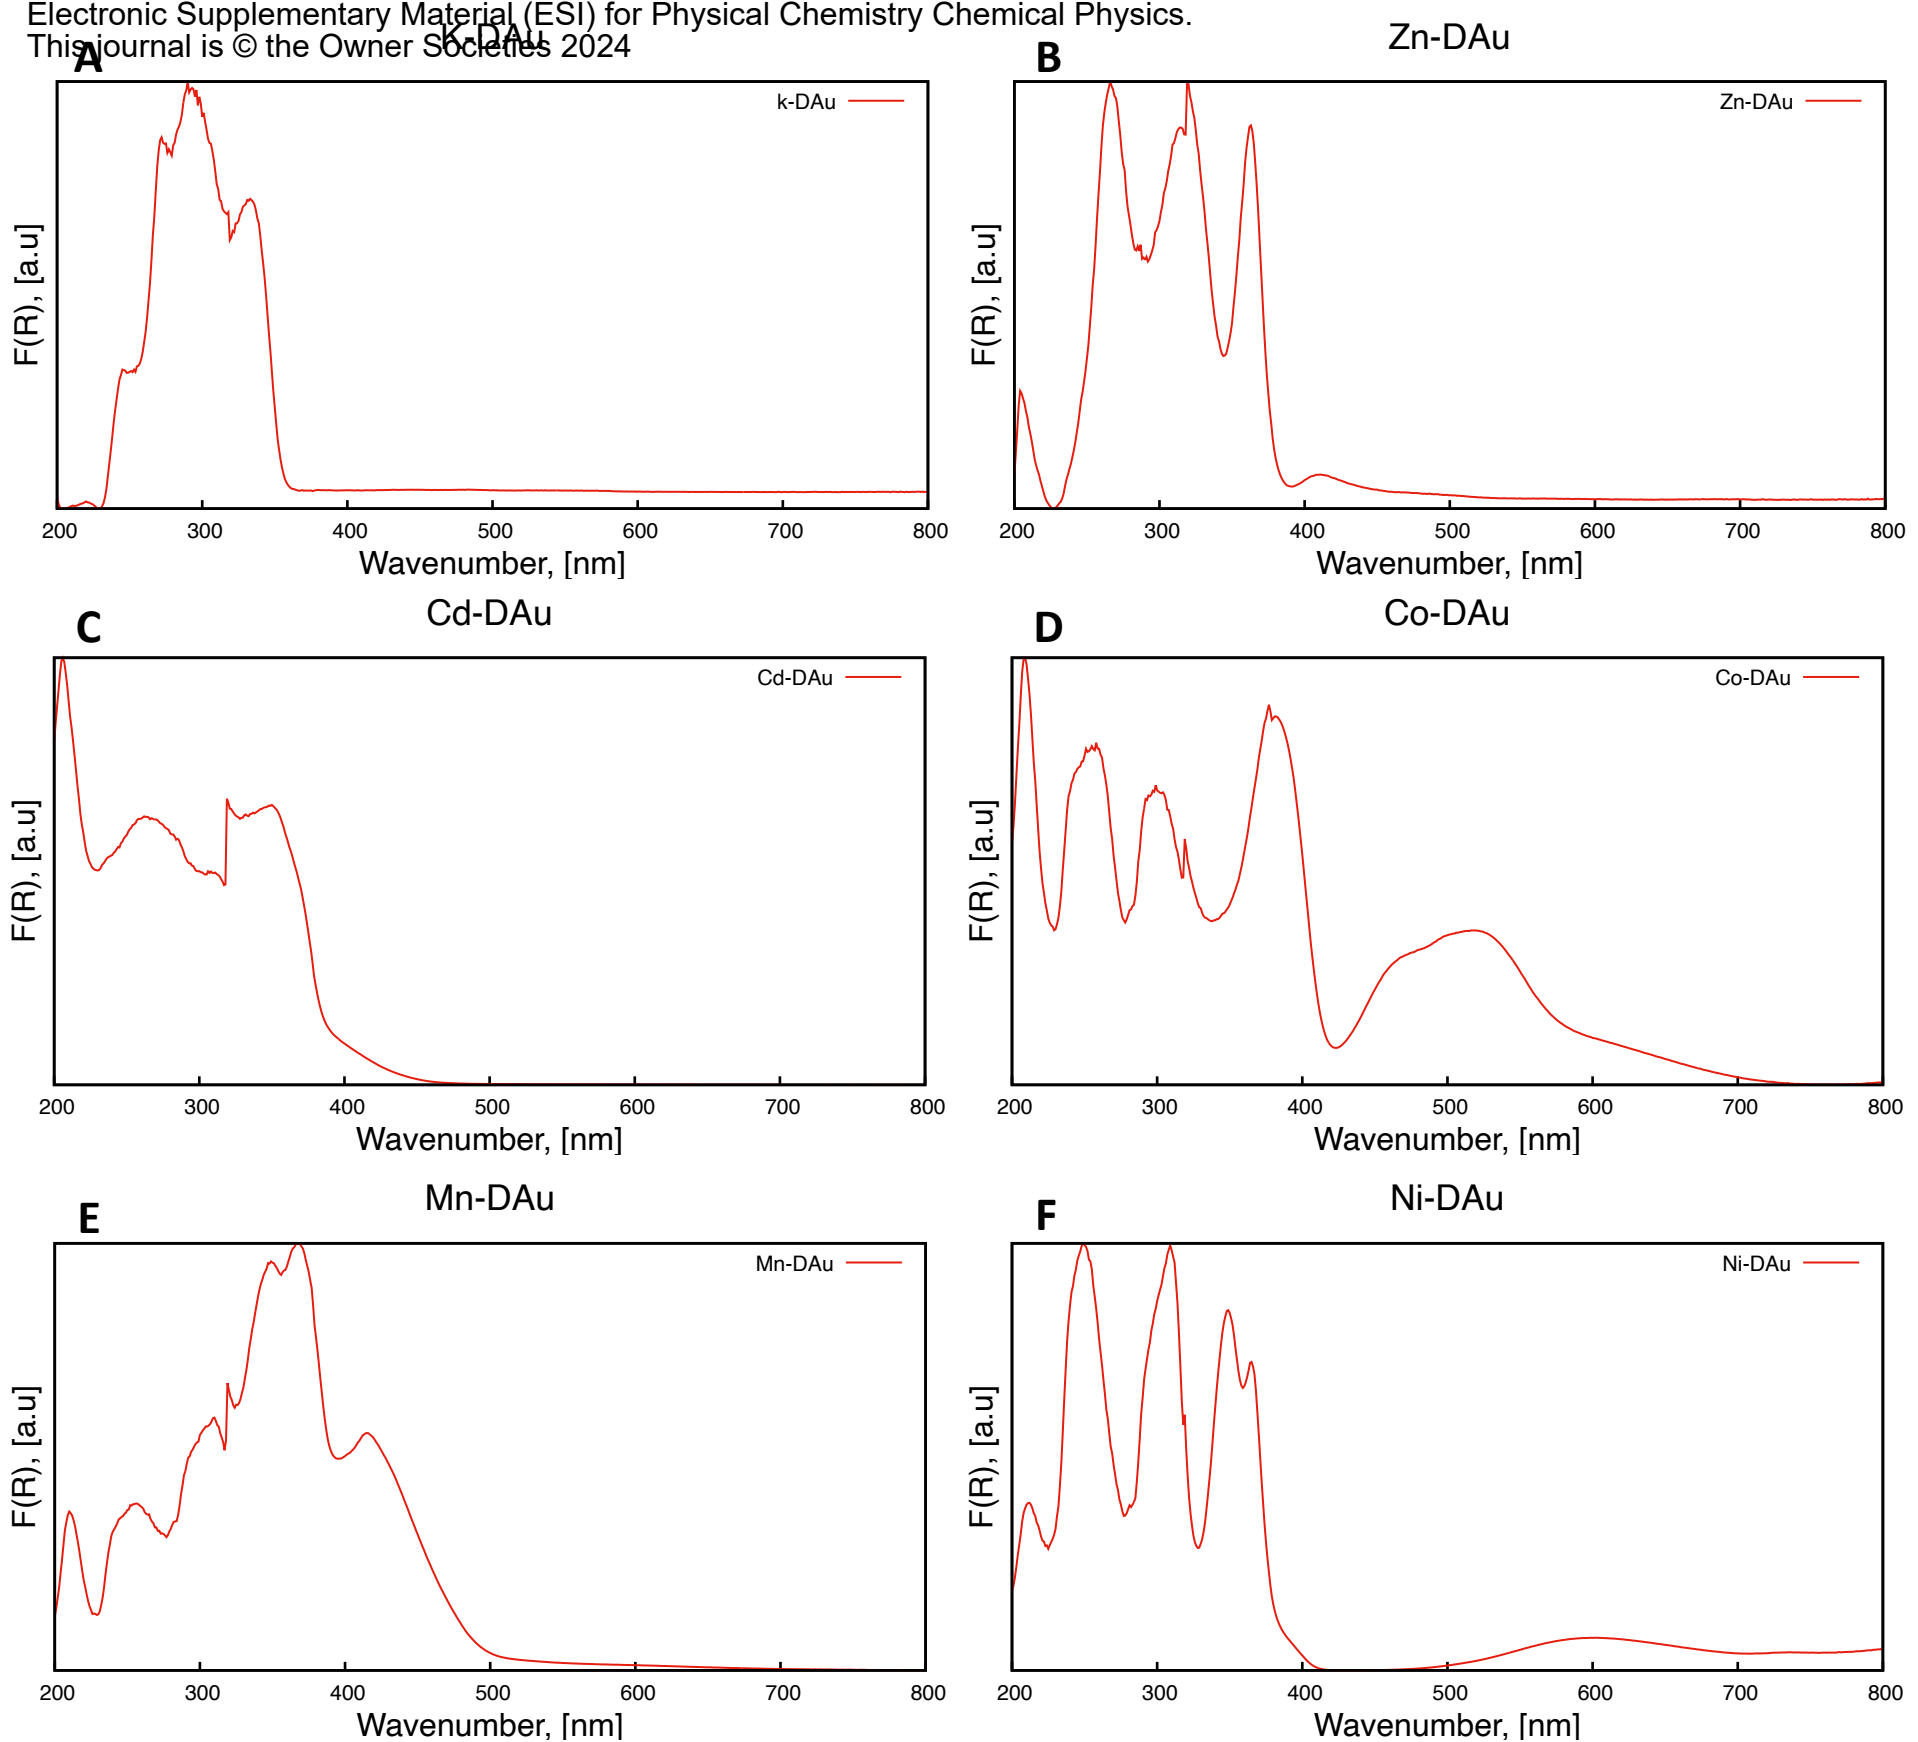

Supplement: d4cp01714e12.pdf [file d4cp01714e12.pdf]

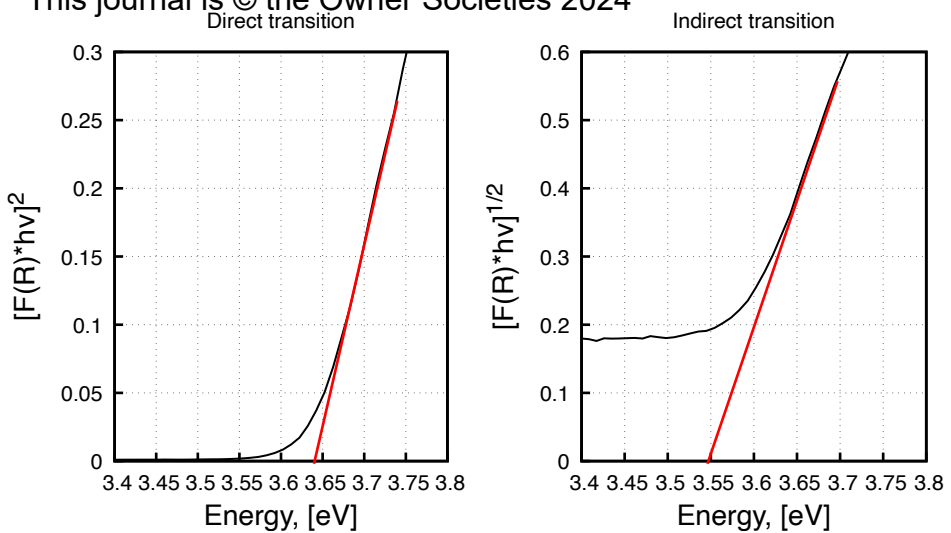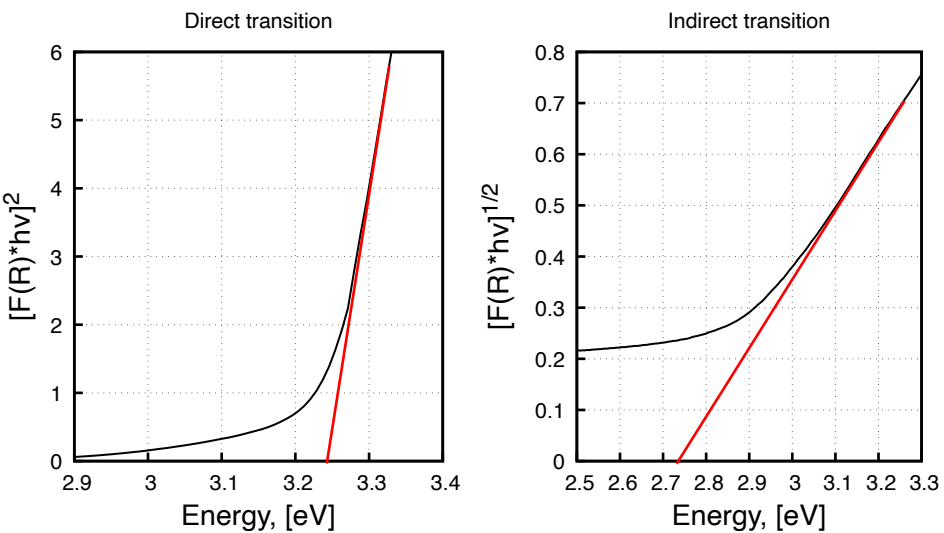

Zn-DAu Tauc plot

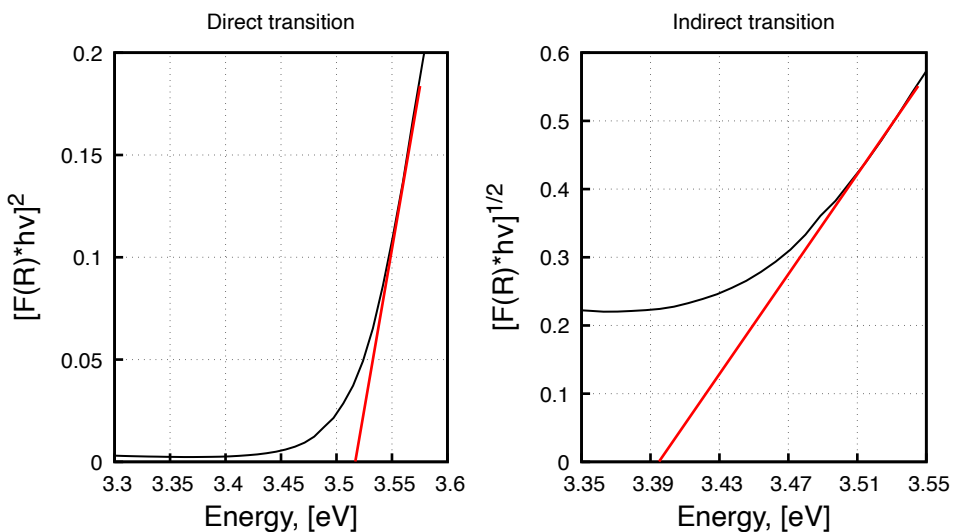

Ni-DAu Tauc plot

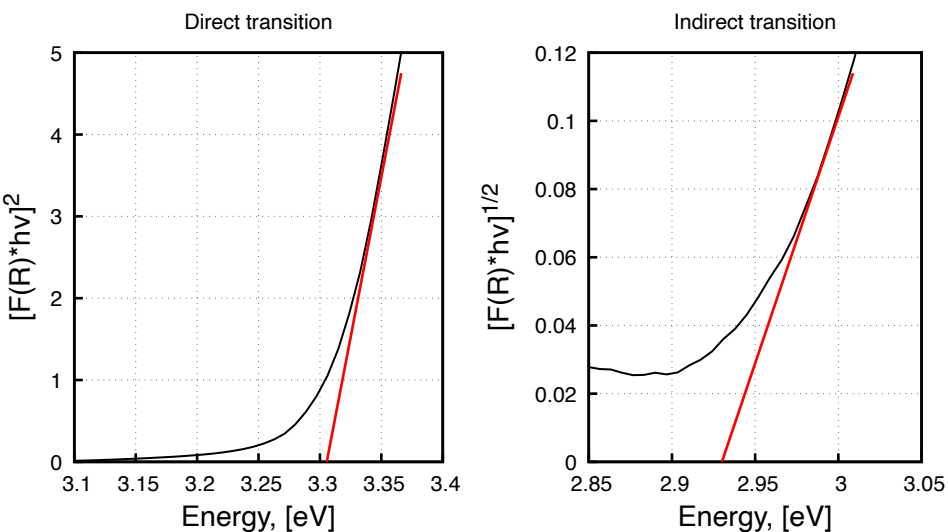

Mn-DAu Tauc plot

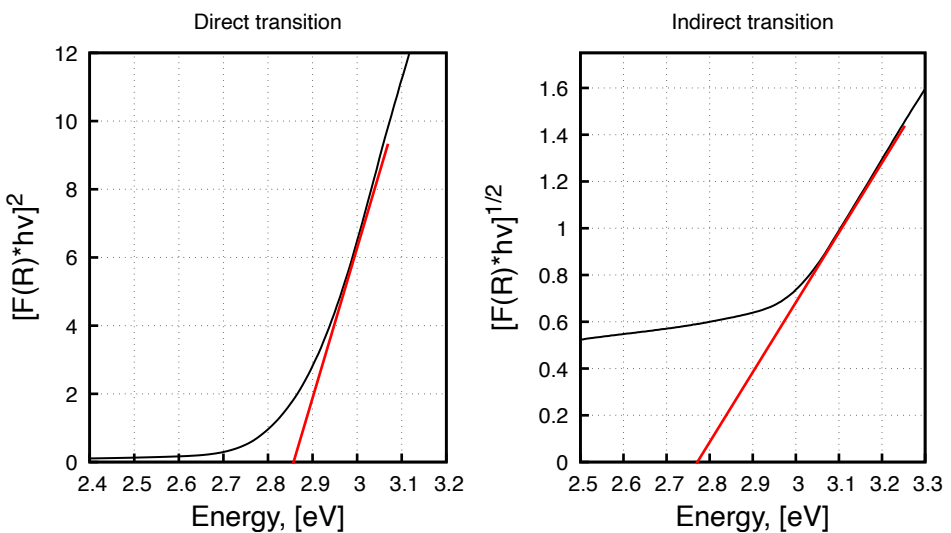

Co-DAu Tauc plot

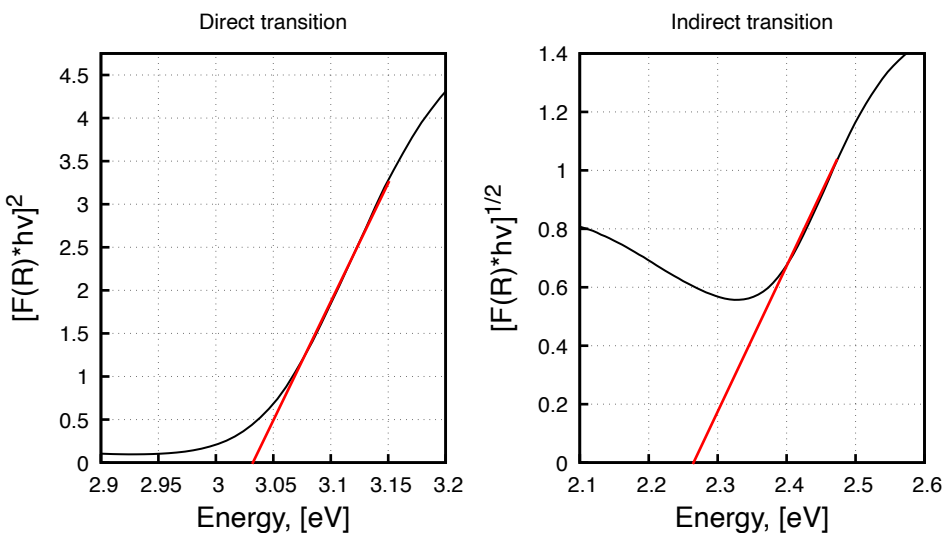

Supplement: d4cp01714e13.pdf [file d4cp01714e13.pdf]

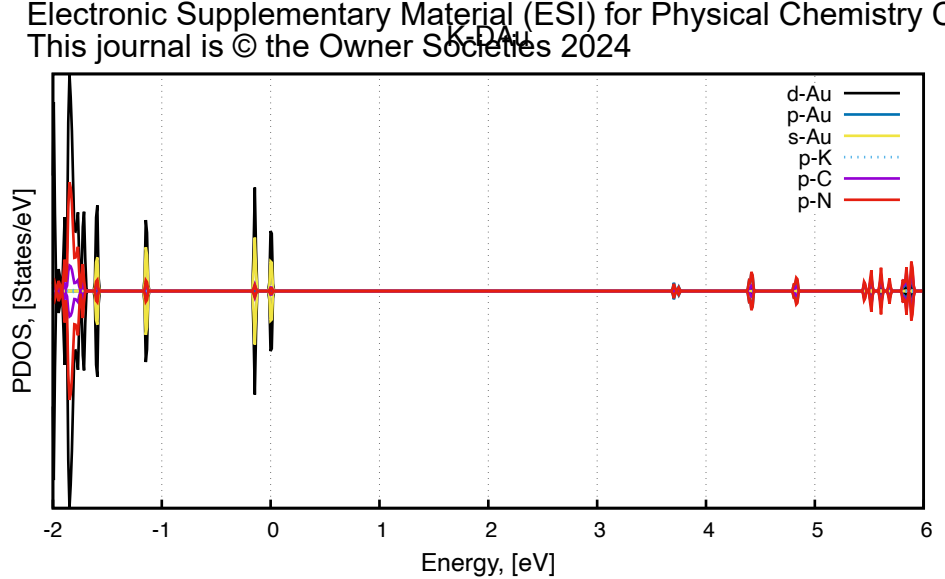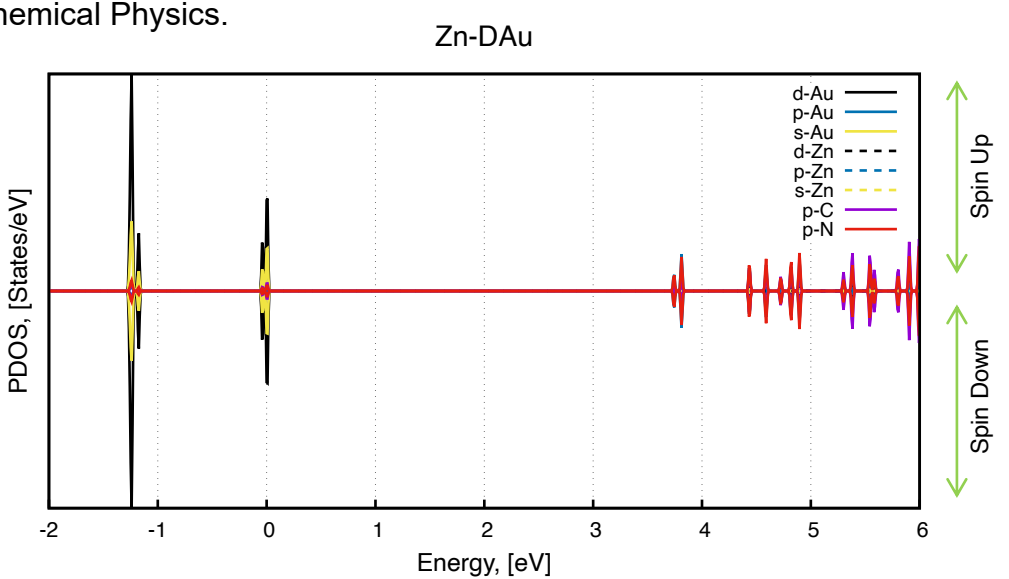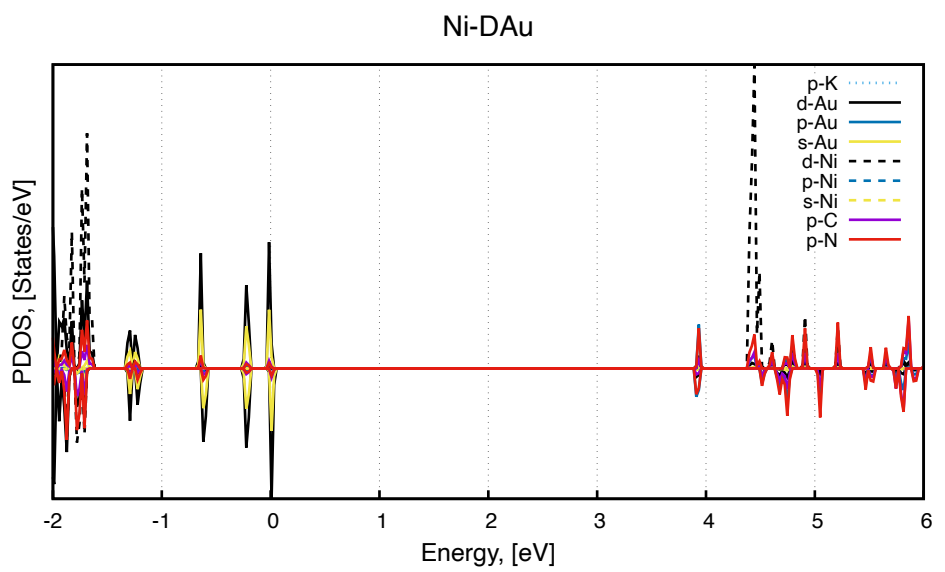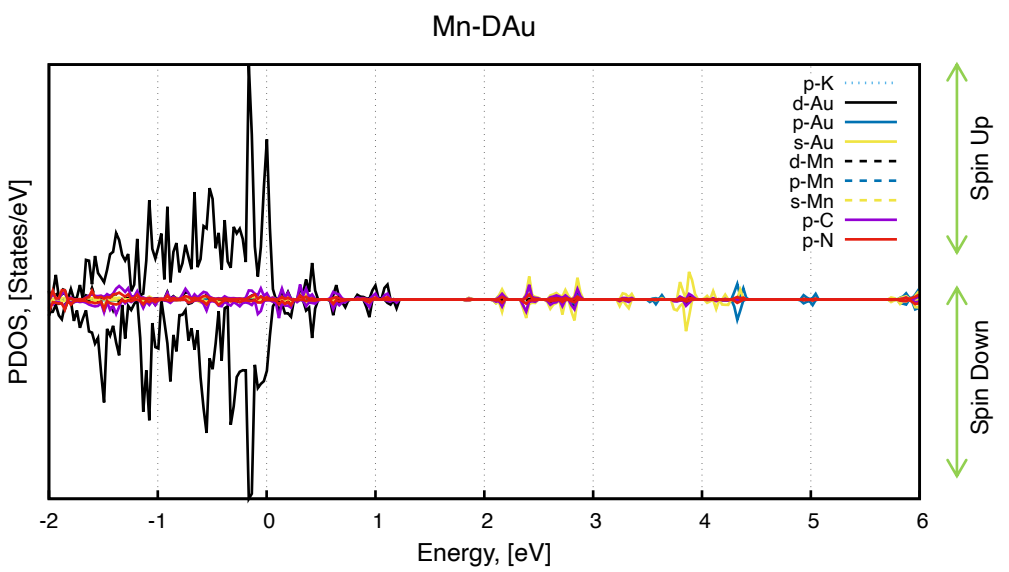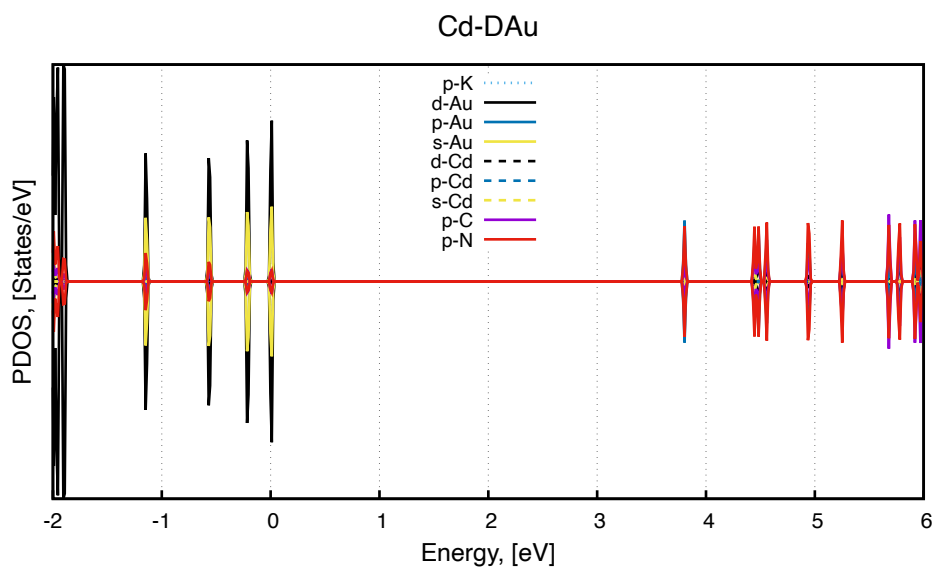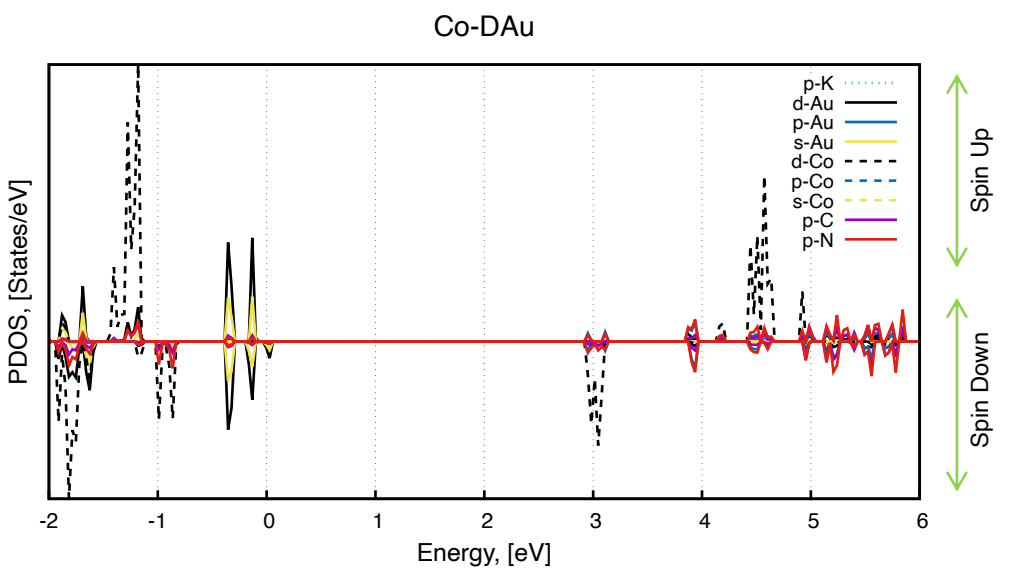

Supplement: d4cp01714e14.pdf [file d4cp01714e14.pdf]

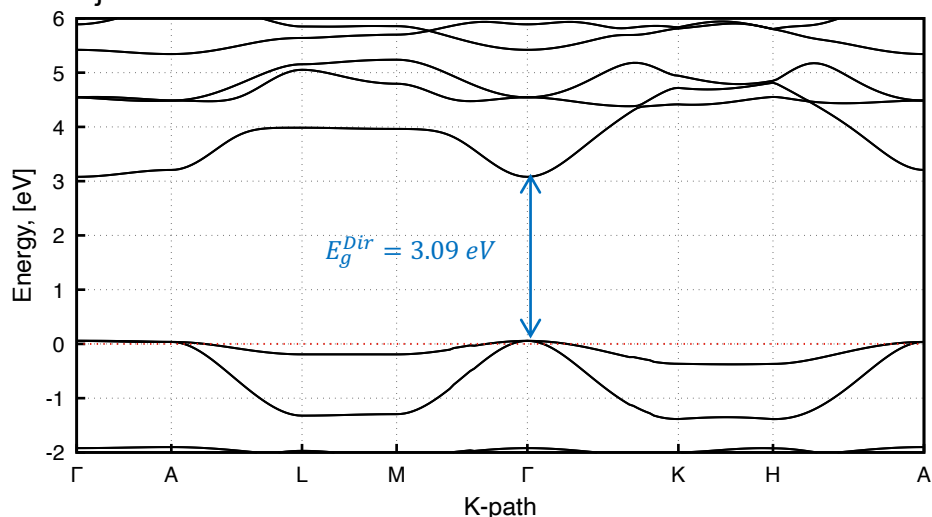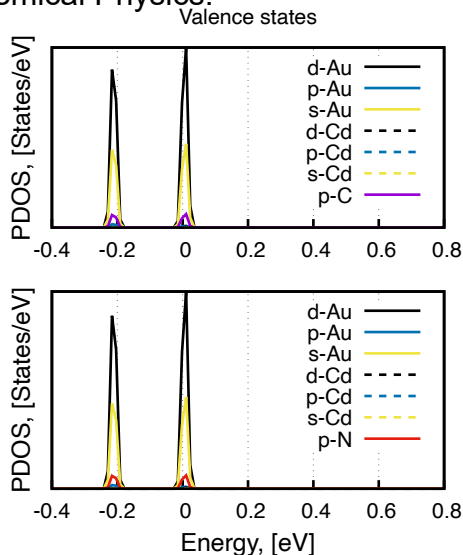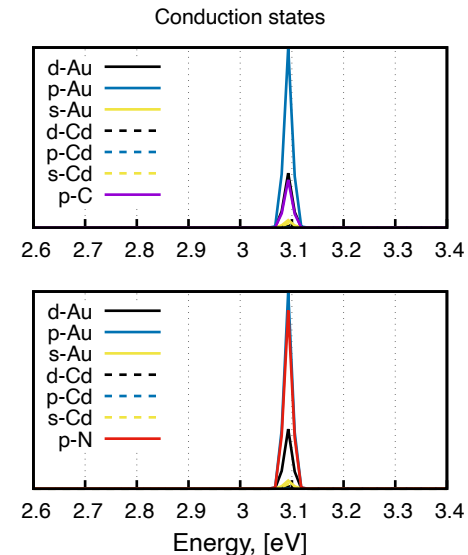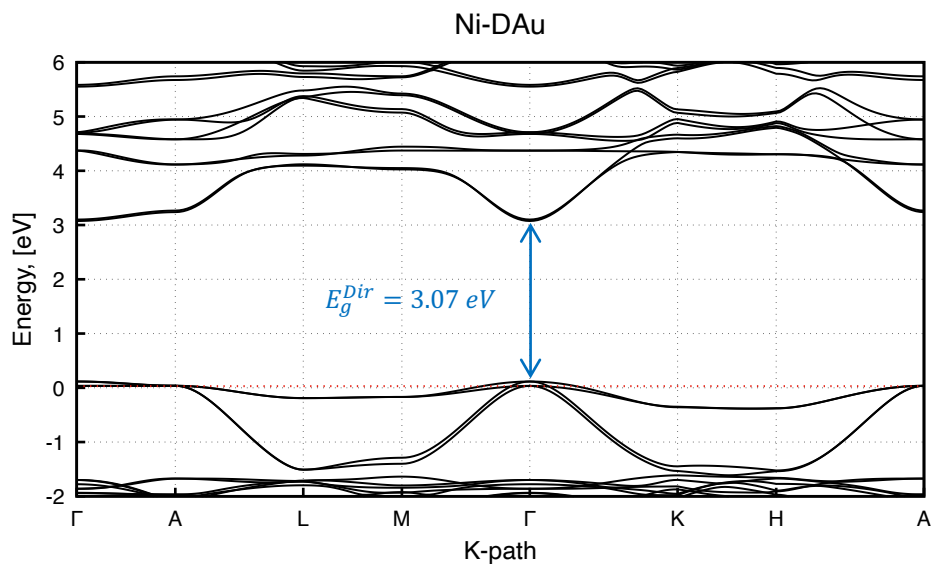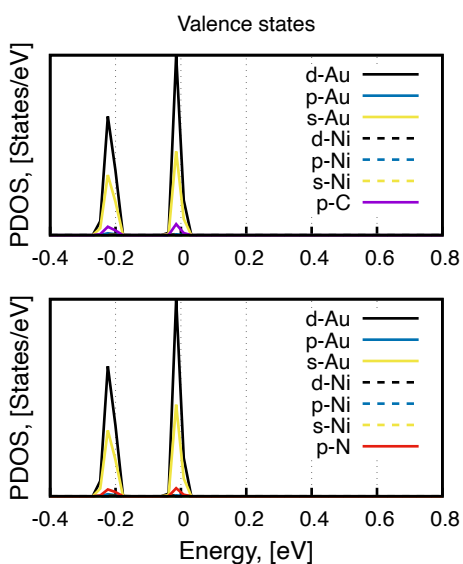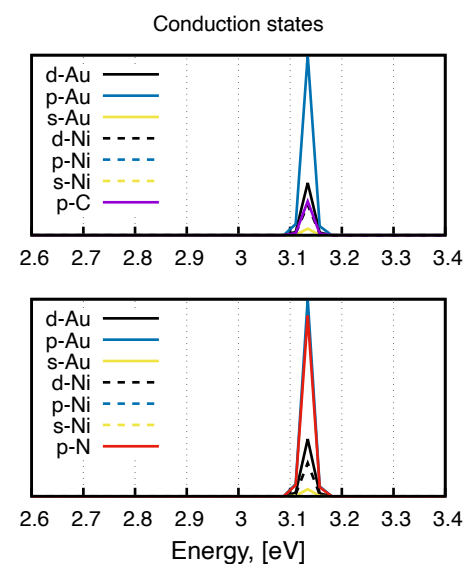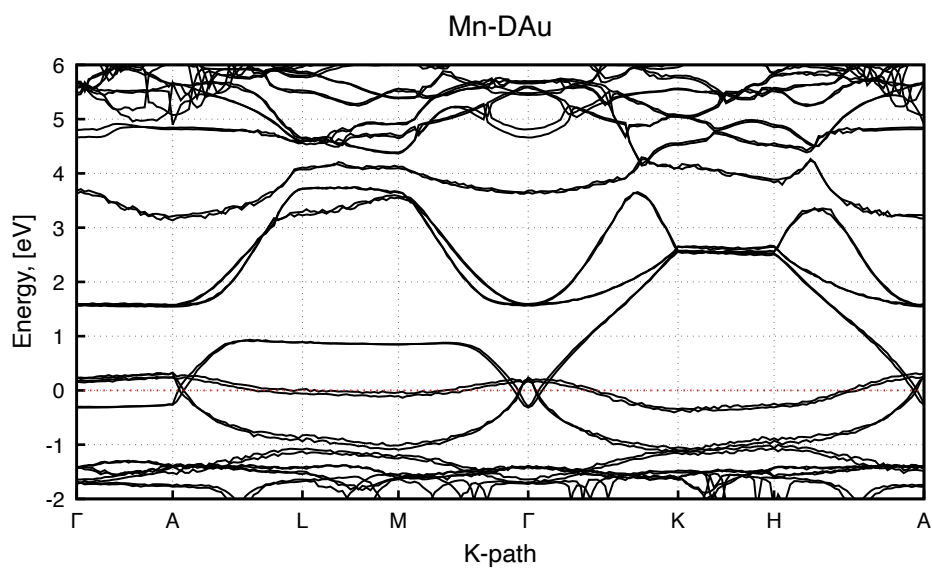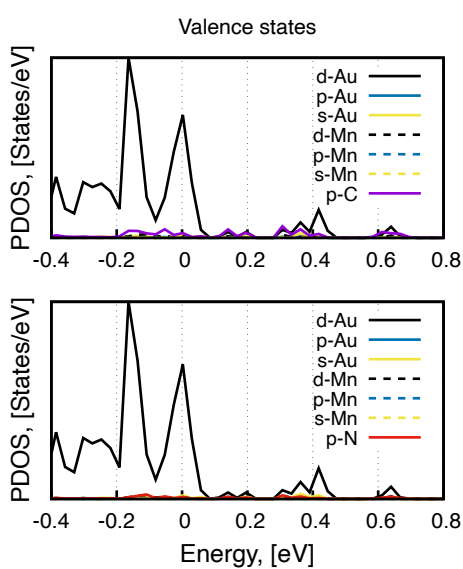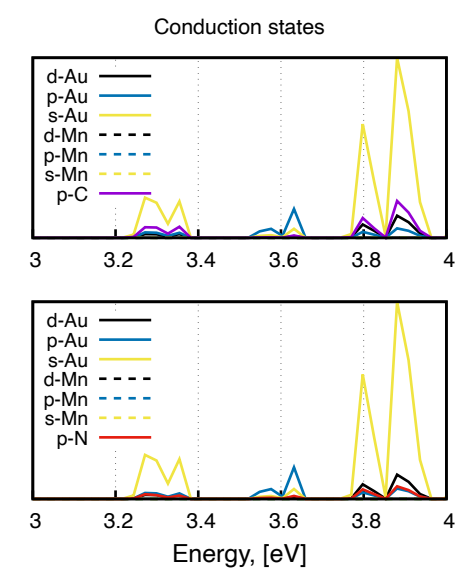

Supplement: d4cp01714e15.pdf [file d4cp01714e15.pdf]

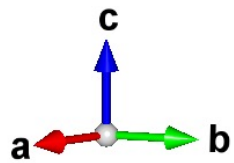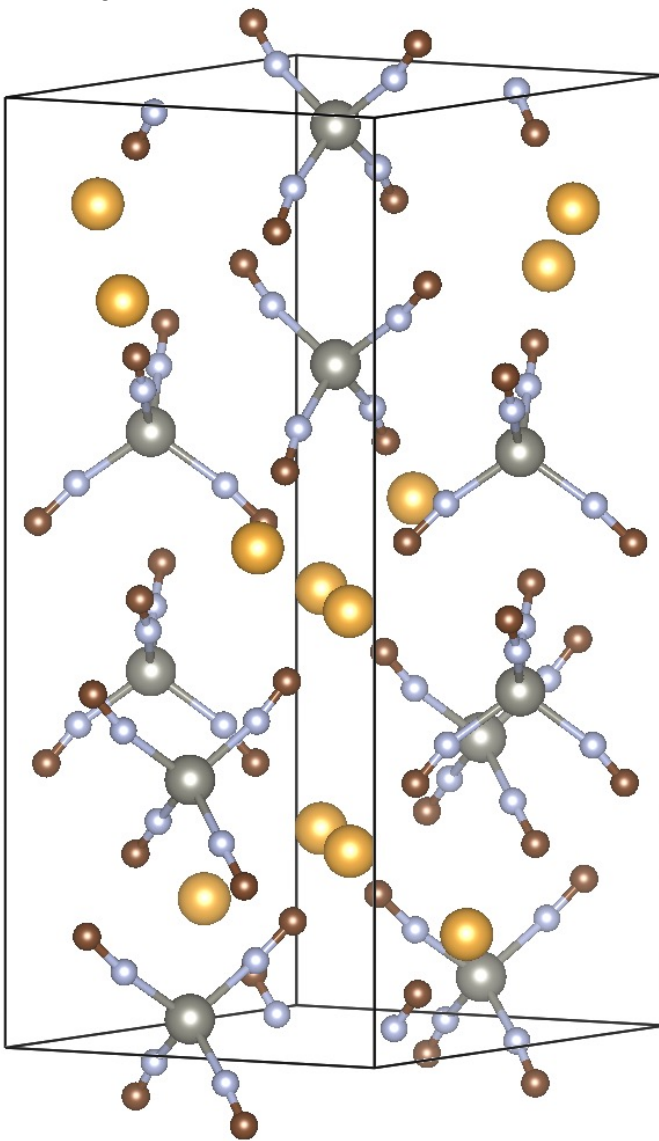

Supplement: d4cp01714e2.pdf [file d4cp01714e2.pdf]

### a) Cd-DAu

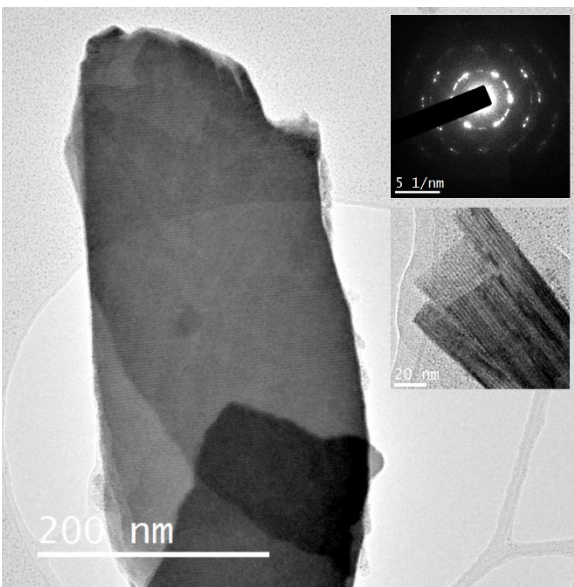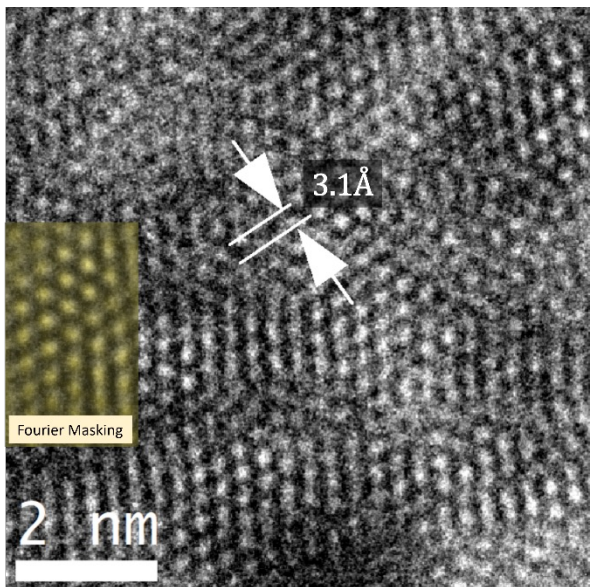

### b) Mn-DAu

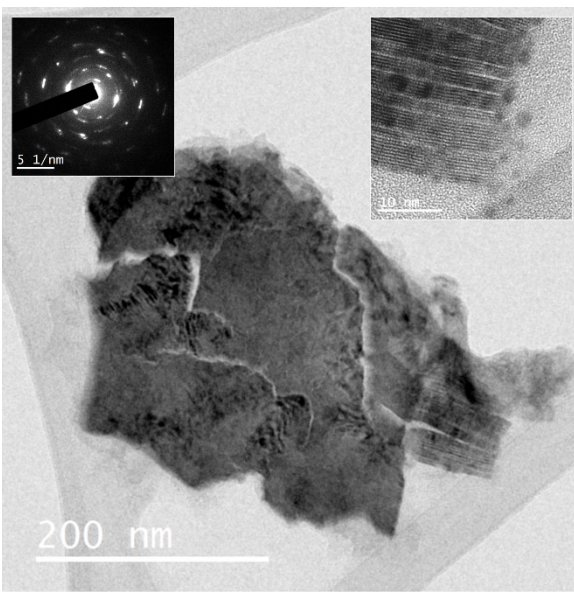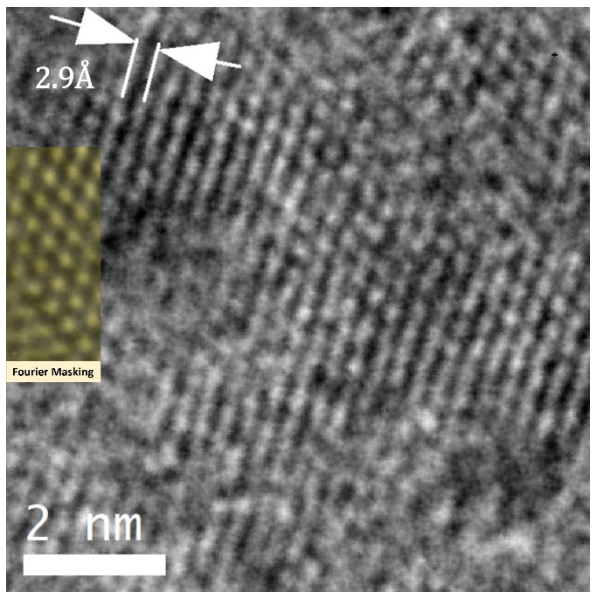

Supplement: d4cp01714e3.pdf [file d4cp01714e3.pdf]

# a) Zn-DAs

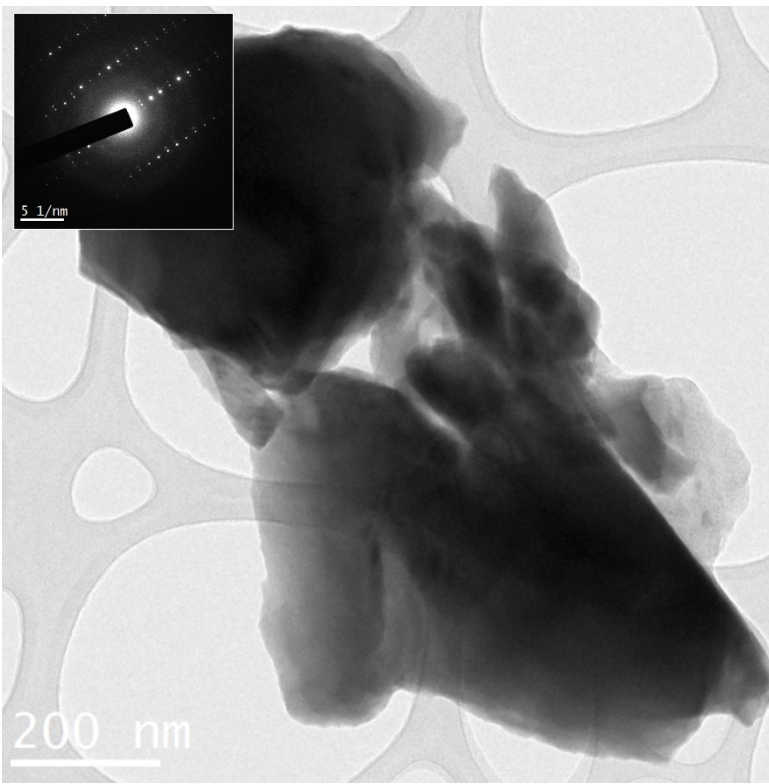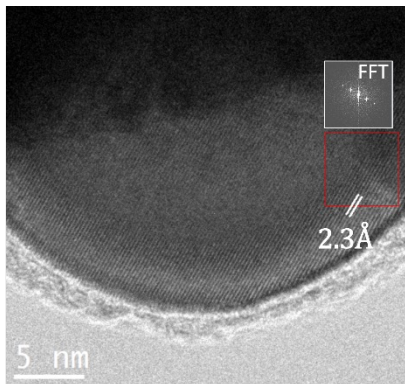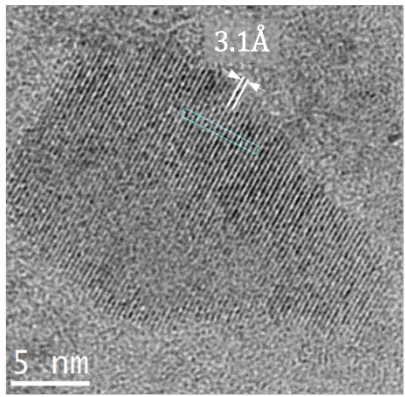

Supplement: d4cp01714e4.pdf [file d4cp01714e4.pdf]

Intensity; [a. u.]

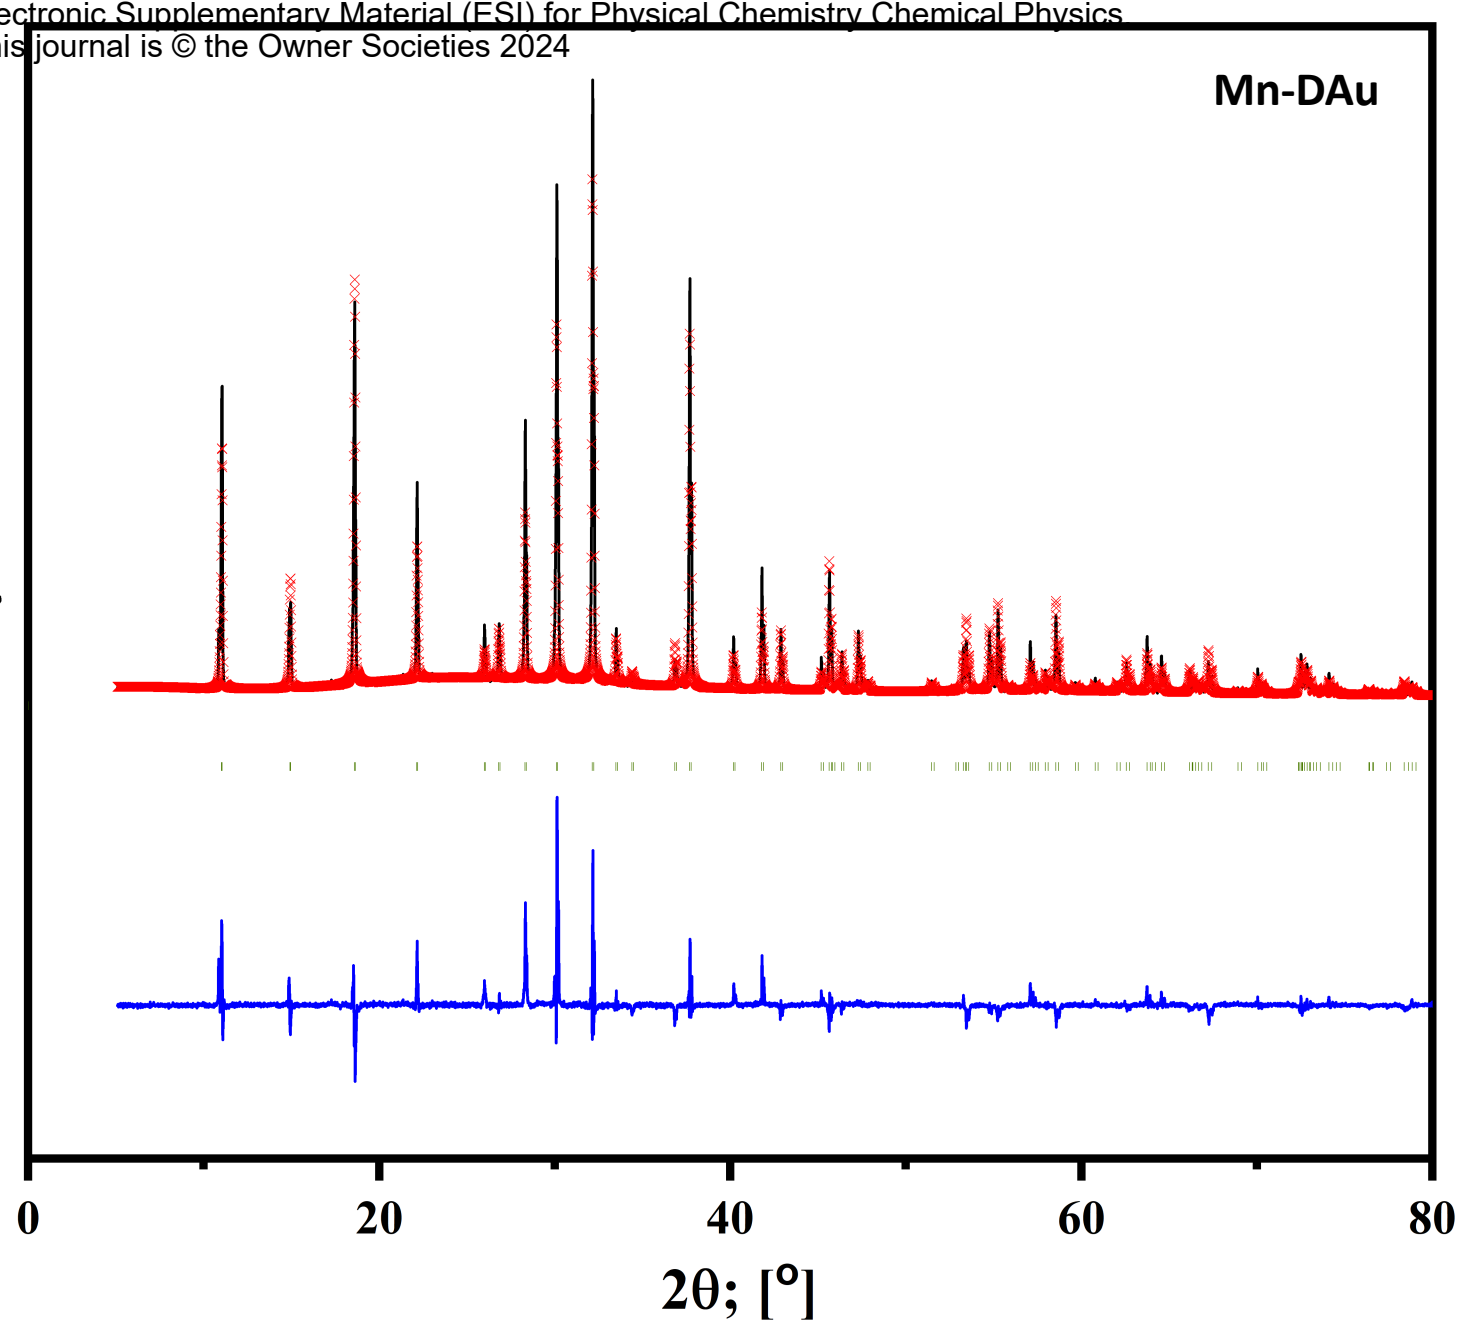

Intensity; [a. u.]

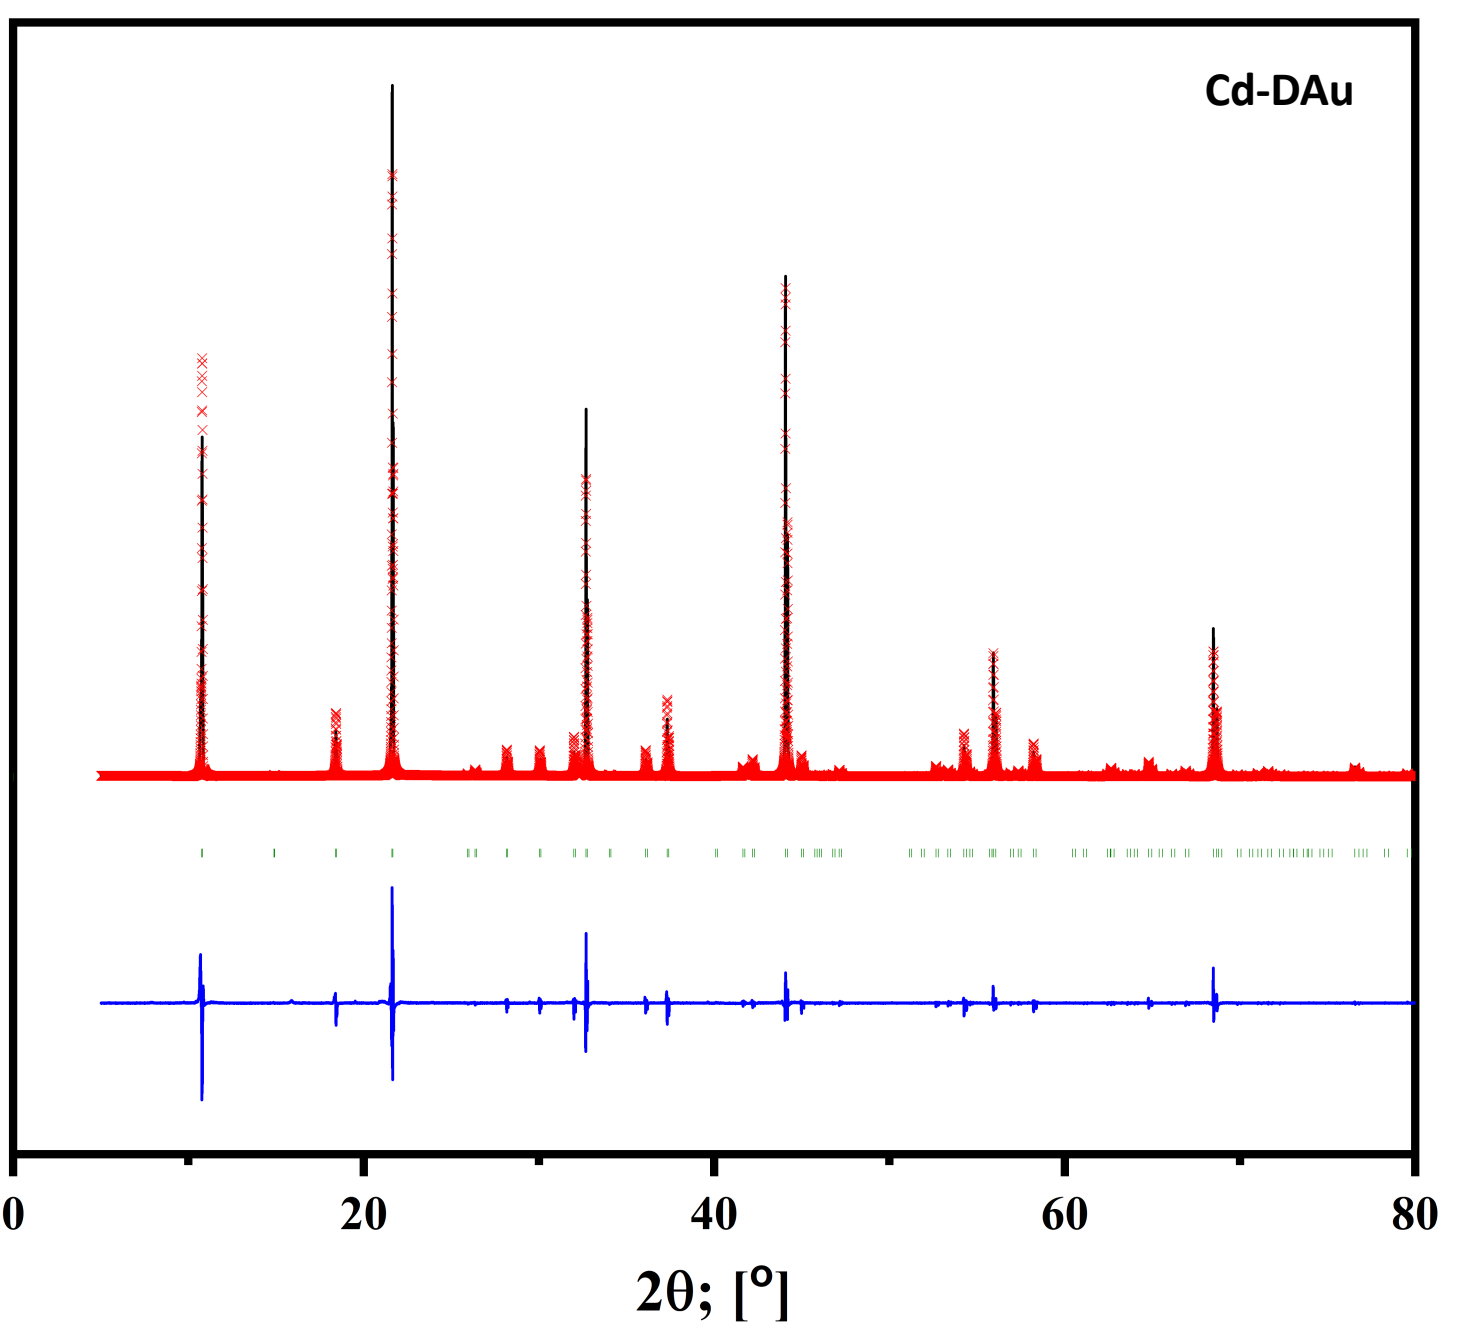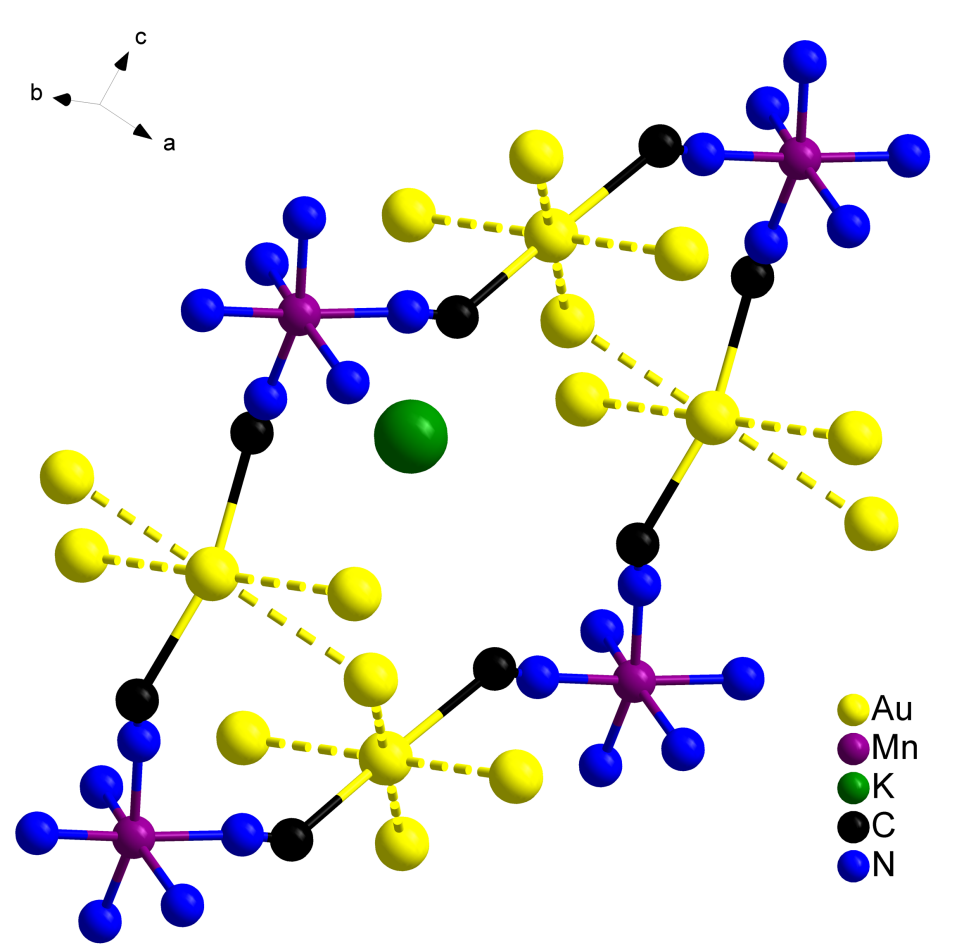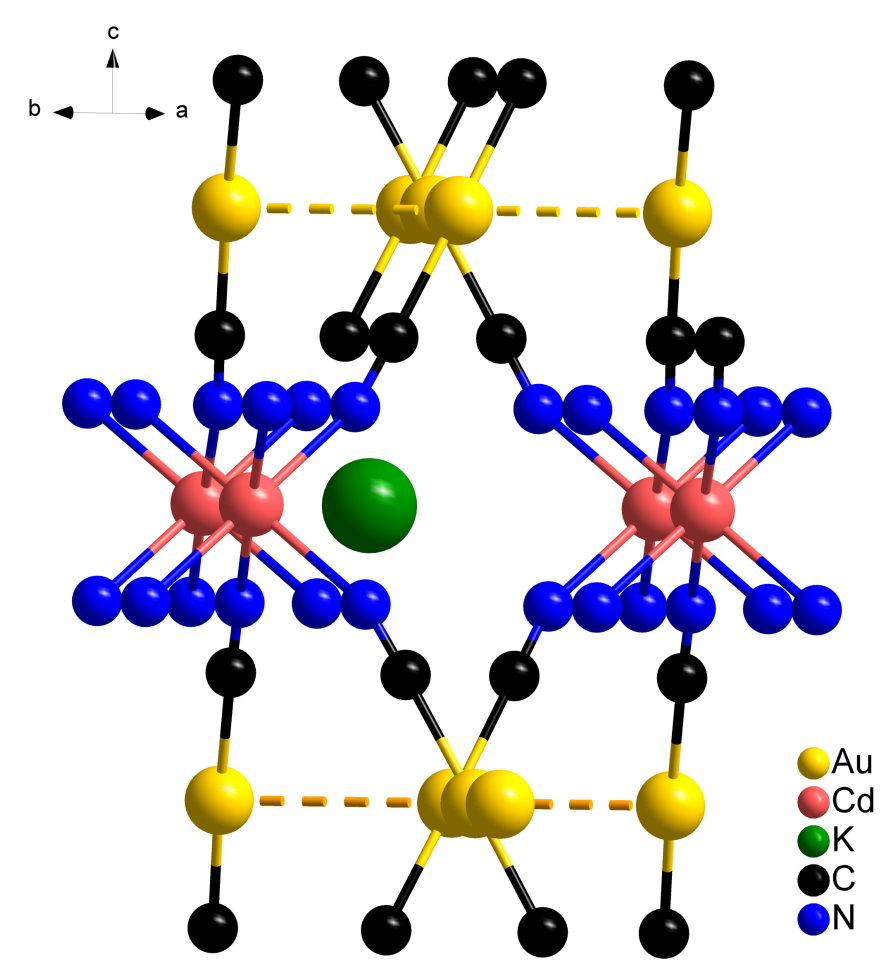

Supplement: d4cp01714e5.pdf [file d4cp01714e5.pdf]

Intensity; [a. u.]

Co2p<sub>3/2</sub>

—●— **Experimental**  
— **Fit**

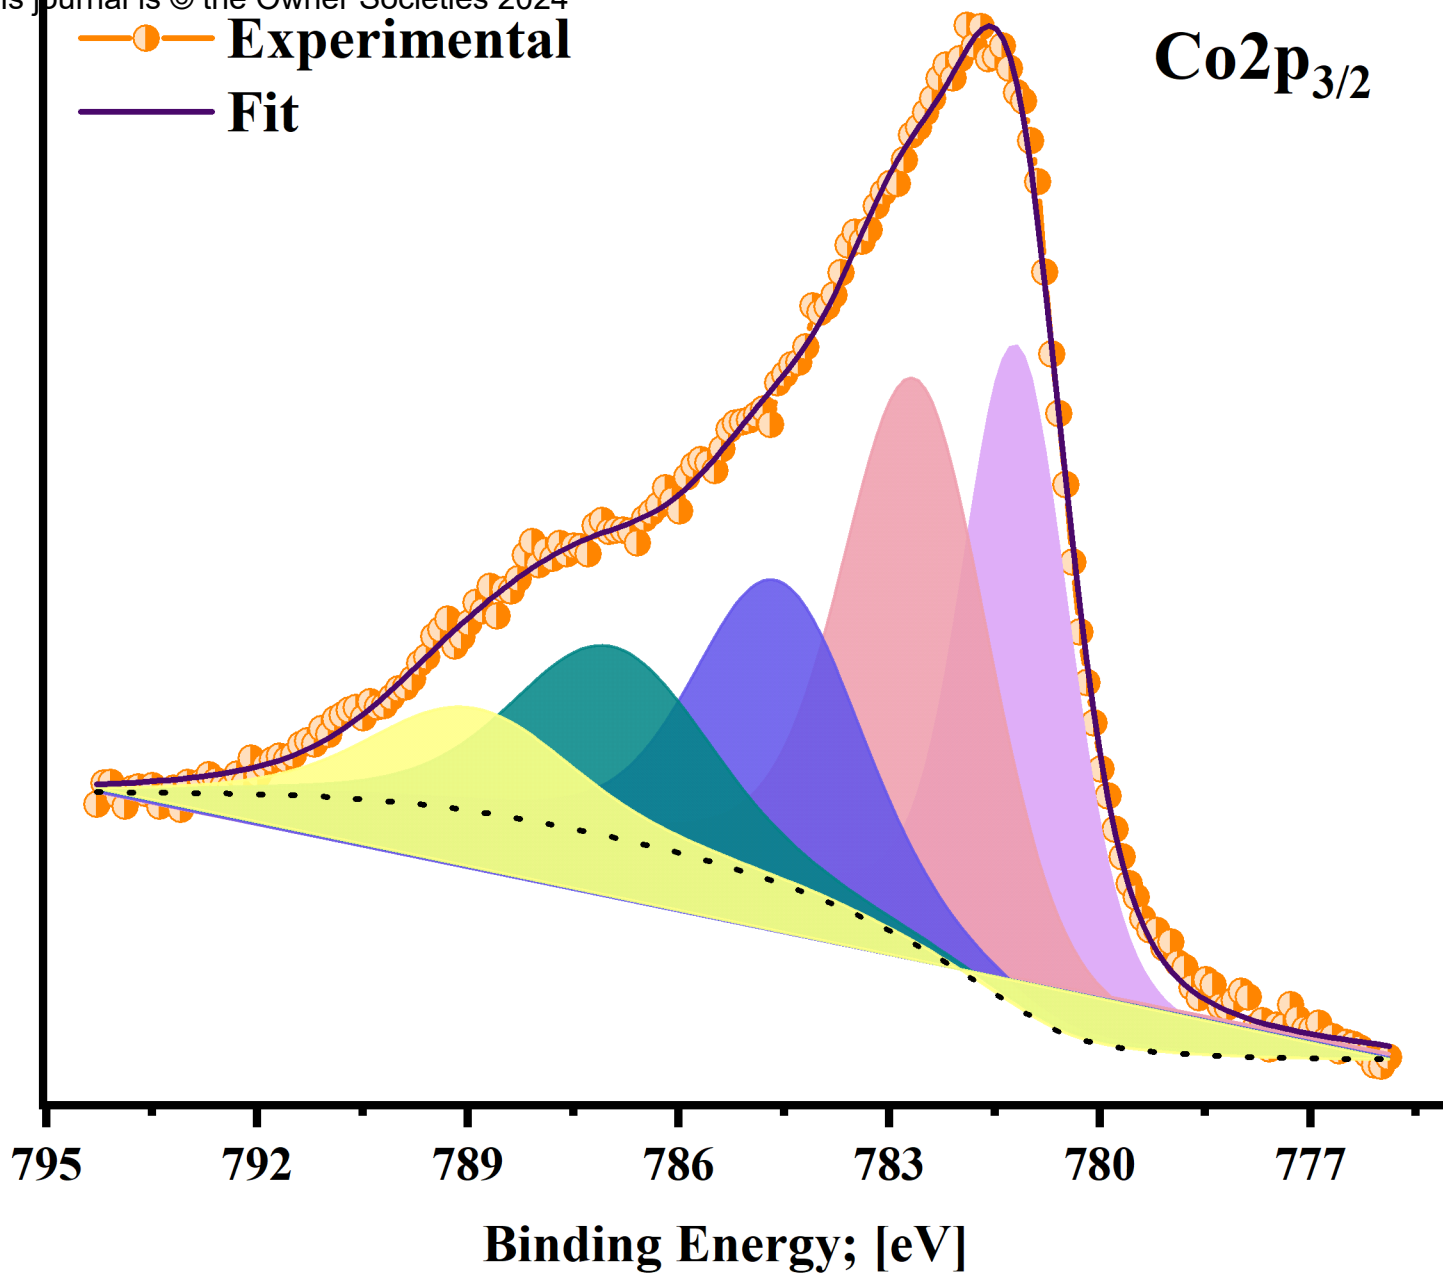

Supplement: d4cp01714e7.pdf [file d4cp01714e7.pdf]

Infrared spectra of (K)M[Au(CN)<sub>2</sub>]<sub>x</sub> series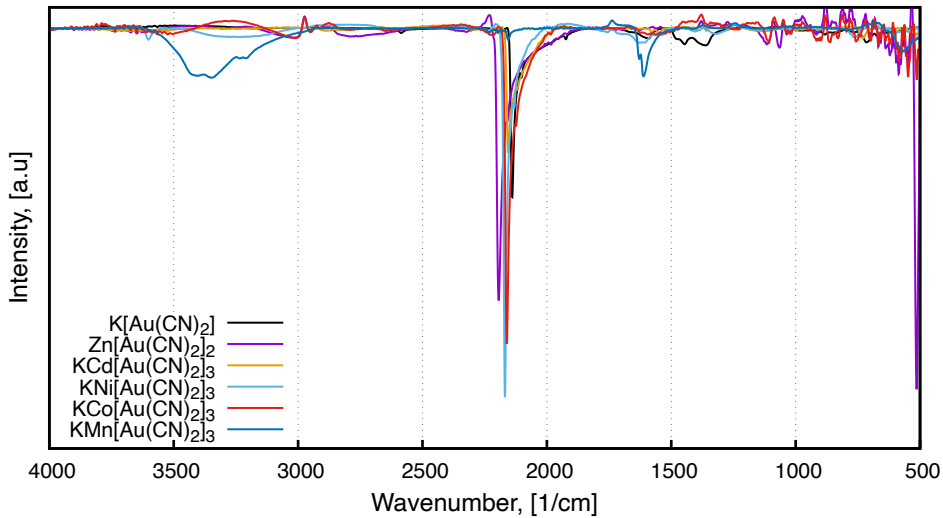

Supplement: d4cp01714e8.pdf [file d4cp01714e8.pdf]

Raman spectra of (K)M[Au(CN)<sub>2</sub>]<sub>x</sub> series

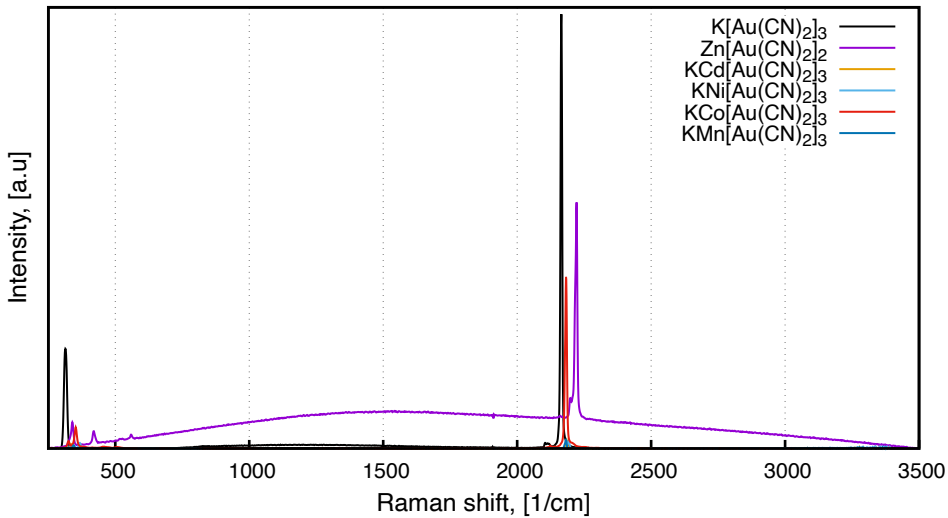

Supplement: d4cp01714e9.pdf [file d4cp01714e9.pdf]
